# Supplementary material for: Dental Epithelial Stem Cells as a Source for Mammary Gland Regeneration and Milk Producing Cells In Vivo
Source: MDPI journal article supplement (doi:10.3390/cells8101302), 2019-10-22
Supplement: s1 [file s1]

Supplementary figures

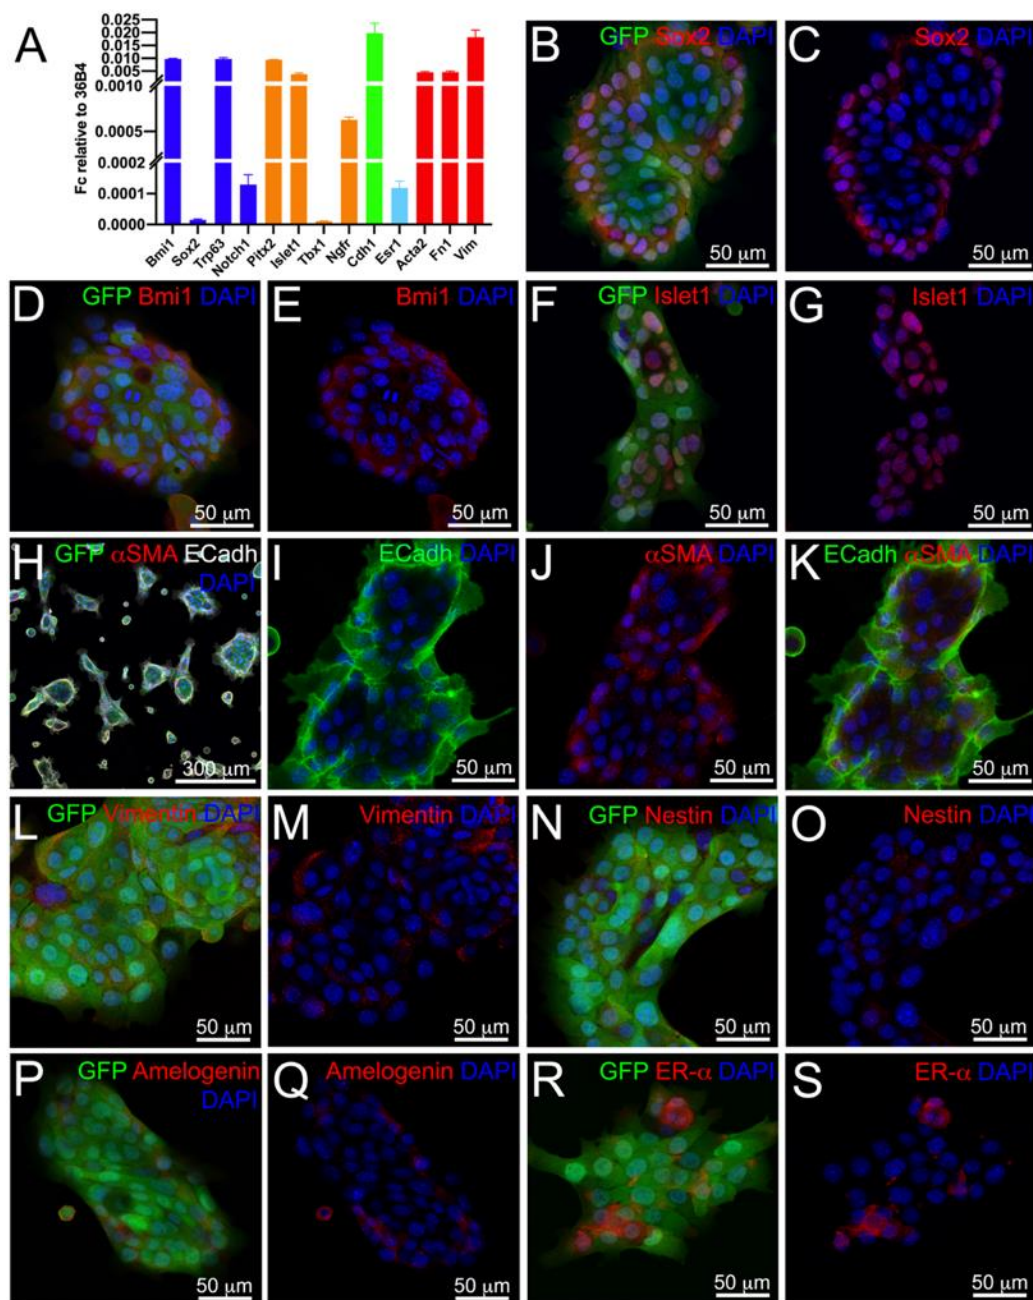

**Figure S1.** Characterization of DESCs. **A)** Real time PCR analysis of expression of genes coding for DESCs markers, epithelial markers, and mesenchymal markers. **B-S)** Immunofluorescent staining showing expression of stem cell markers (B-E), classical incisor's markers (F, G), epithelial vs mesenchymal markers (H-O), the ameloblastic differentiation marker amelogenin (P, Q), and estrogen receptor  $\alpha$  (R, S). Abbreviations: ER- $\alpha$ , estrogen receptor  $\alpha$  ; GFP, green fluorescent protein.

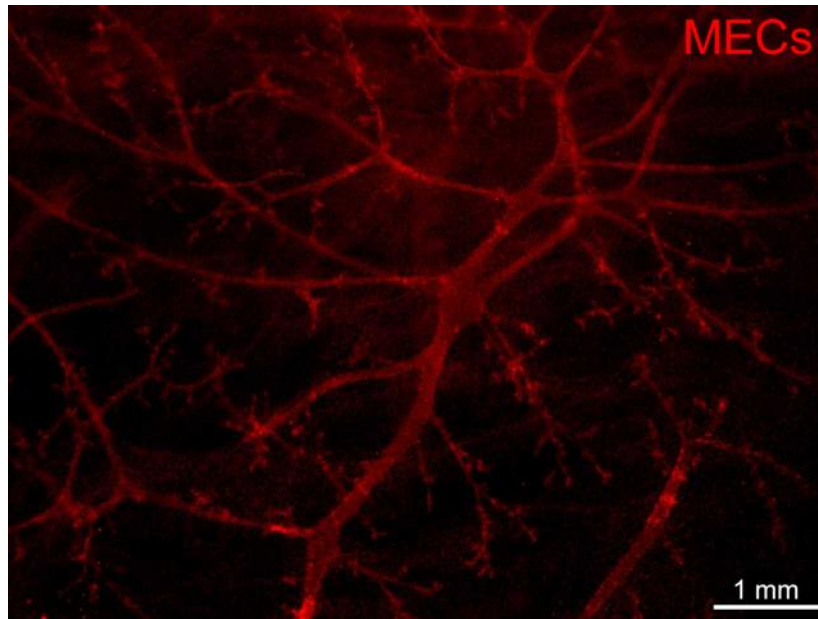

**Figure S2.** Positive control of mammary reconstitution: dsRed-expressing mammary epithelial cells (MECs) injected alone in cleared fat pads can reconstitute a fully developed mammary epithelium. Abbreviations: MECs, mammary epithelial cells.

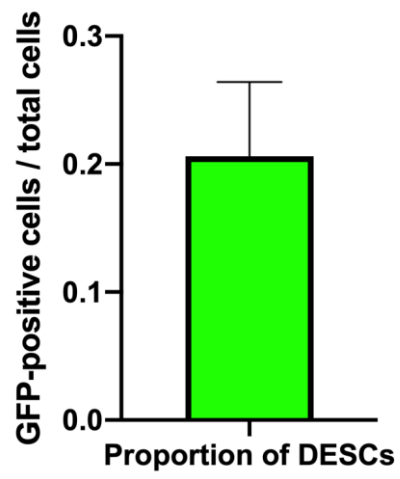

**Figure S3.** Proportion of DESCs-derived GFP-positive cells contributing to mammary ducts upon transplantation with MECs (1:1 ratio).

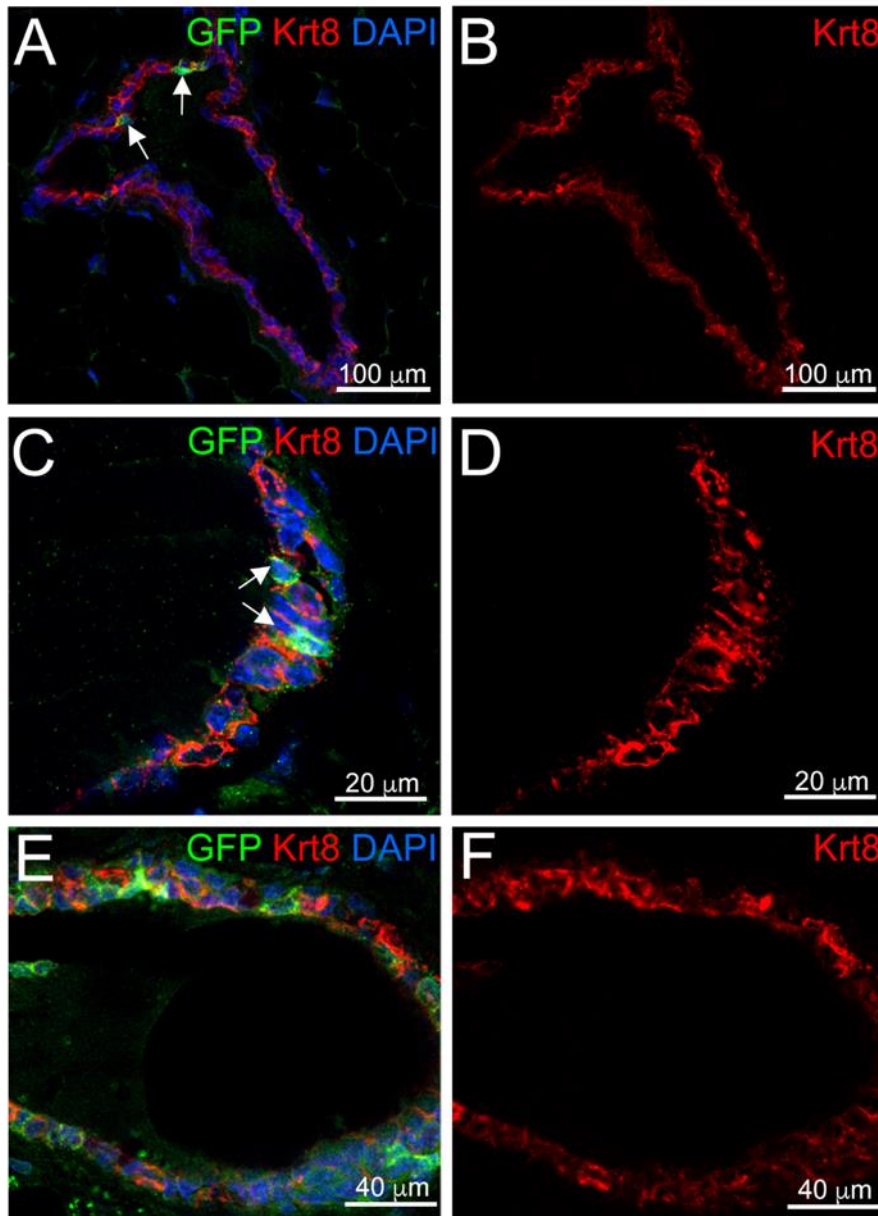

**Figure S4.** DESCs integrate in the luminal compartment of the regenerated mammary epithelium (white arrowheads). A-D) Immunofluorescent staining against GFP (green color) and Keratin 8 (red color) on mammary fat pads injected with a 1:1 mixture of DESCs and MECs. B and D show the single red channel (Krt8) of A and C, respectively. E, F) Immunofluorescent staining against GFP (green color) and Keratin 8 (red color) on mammary fat pads injected with DESCs. F shows single red channel (Krt8) of E. Abbreviations: GFP, green fluorescent protein; Krt8, keratin 8.



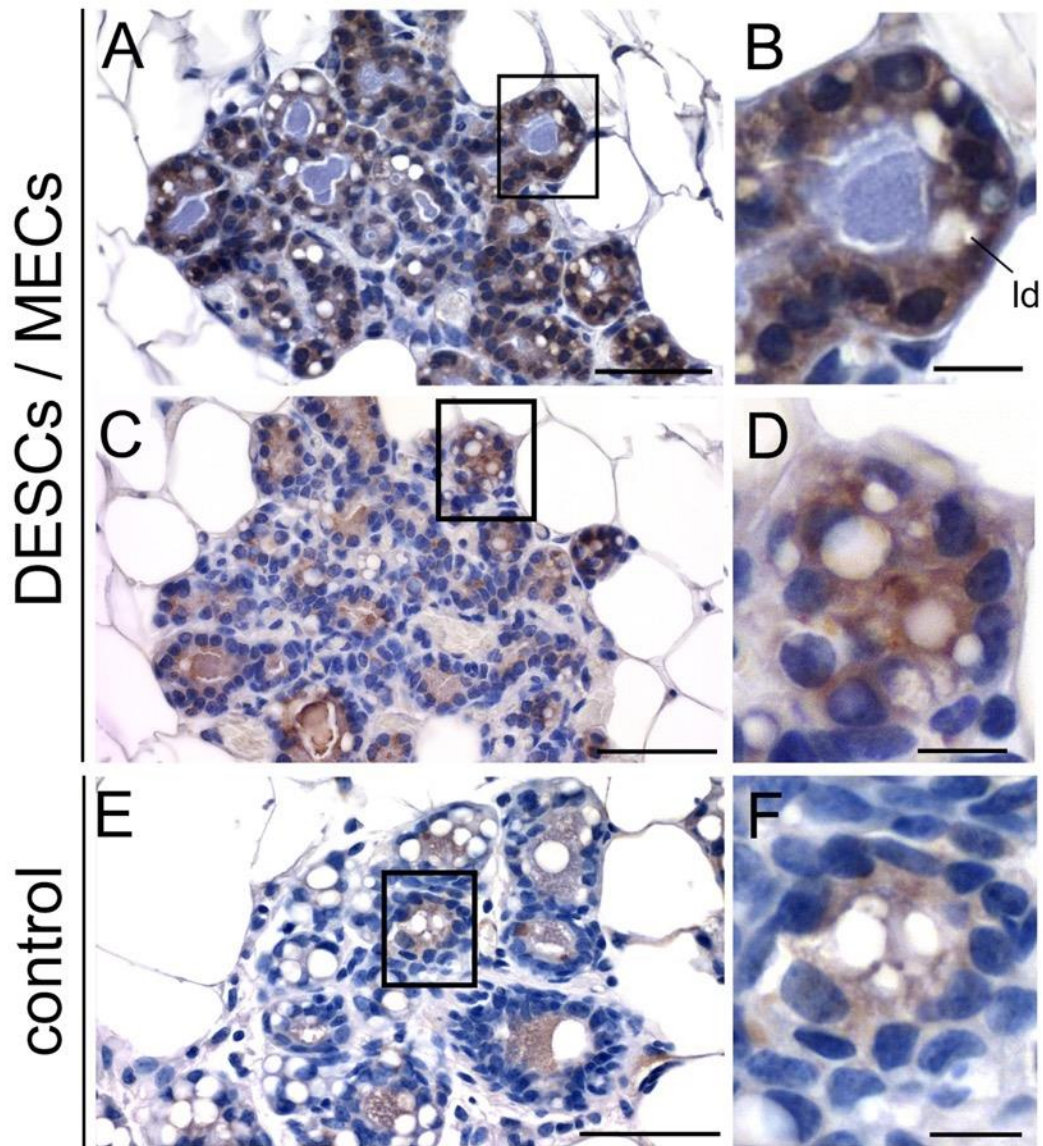

**Figure S5.** DESCs give rise to milk-producing,  $\beta$ -casein-positive cells. A-D) Immunohistochemistry against GFP (A, B) and  $\beta$ -casein (C, D) on mammary fat pads injected with a 1:1 mixture of DESCs and MECs. E, F) Control immunohistochemistry against  $\beta$ -casein on a P16 (pregnancy day 16) mammary gland. Scale bars: A, C, E: 40  $\mu$ m; B, D, F: 10  $\mu$ m.

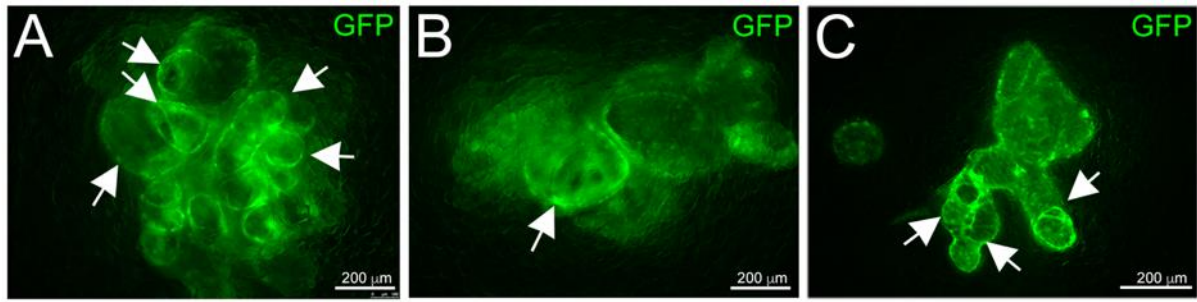

**Figure S6.** DESCs transplanted in cleared mammary fat pads give rise to rudimentary branched structures. A-C) Whole mount imaging of mammary fat pads transplanted with GFP-positive DESCs. White arrows indicate some of the observed branches.
